# 1 Title

## 2 A bacterial parasite effector mediates insect vector attraction in host plants 3 independently of developmental changes

4

### 5 Authors

6 Zigmunds Orlovskis<sup>1</sup>, Saskia Hogenhout<sup>1</sup>

7 <sup>1</sup>Department of Cell and Developmental Biology, John Innes Centre, Norwich

8 Research Park, Norwich, Norfolk, NR4 7UH, UK

9

### 10 Correspondence

11 saskia.hogenhout@jic.ac.uk

12

### 13 Summary

14 Parasites can take over their hosts and trigger dramatic changes in host appearance  
15 and behaviour that are typically interpreted as extended phenotypes to promote  
16 parasite survival and fitness <sup>1</sup>. For example, *Toxoplasma gondii* manipulates the  
17 behaviour of infected rodents to aid transmission to cats <sup>2</sup> and parasitic trematodes  
18 of the genus *Ribeiroia* alter limb development in their amphibian hosts to facilitate  
19 predation by birds <sup>3</sup>. Plant parasites and pathogens also reprogram host  
20 development and morphology <sup>4</sup>. Phytoplasma parasites of plants induce extensive  
21 leaf-like flower phenotype (phyllody) in their host plants, presumably to attract insect  
22 vectors on which these bacteria depend for transmission <sup>5,6</sup>. However, it remains  
23 debatable whether morphological phenotypes, such as phyllody, are directly  
24 beneficial to the parasites or are side-products of parasite infection <sup>7,8</sup>. Previously,  
25 we found that phytoplasma virulence protein (effector) SAP54 binds and mediates

degradation of host MADS-box transcription factors (MTFs), regulatory hubs of plant development and hormone physiology, to induce phyllody and promote insect vector colonisation<sup>5</sup>. Here we show that plants heterologously expressing SAP54 are strongly attractive to insects, but surprisingly, insect attraction was independent of the presence of leaf-like flowers. Moreover, plants that produce leaf-like flowers in the absence of SAP54 did not attract insects. We conclude that the SAP54 effector mediates insect vector attraction in host plants by exploiting the role of its MTF targets in insect defence and that perturbation of floral development may be a secondary effect of the effector activity.

35

## 36 Results and Discussion

The aster leafhopper *Macrostelus quadrilineatus* is the most important insect vector of the phyllody-inducing 'Ca. Phytoplasma asteris' strain Aster Yellows Witches Broom (AY-WB). This leafhopper favours to colonise phytoplasma-infected plants and GFP-SAP54 transgenic plants with phyllody/leaf-like flowers compared to non-infected plants and GFP transgenic plants with wild type flowers<sup>5</sup>. We confirmed these findings in independent insect choice experiments; the insects produced more progeny on GFP-SAP54 transgenic plants with leaf-like flowers (Figure 1A) and, in addition, we found that the insects also spent more time on plants with leaf-like flowers (Figure S1), thus demonstrating both reproductive and orientation preference of insect vectors for these plants. However, when insects were not given a choice between host plants, by caging the leafhoppers on either GFP-SAP54 transgenic plants with leaf-like flowers or control GFP transgenic plants with wild type flowers, no increase in nymph production was observed (Figure S2).

50 Thus, the observed leafhoppers preference is the result of preferential orientation to  
51 plants with leaf-like flowers rather than an increase in reproductive efficiency *per se*.

52 These results prompted us to further examine if the insects are attracted by  
53 leaf-like flowers or repelled by wild-type flowers. Interestingly, insects resided and  
54 occasionally fed on both normally developed as well as leaf-like floral structures  
55 (Figure S3A), suggesting that the two types of flowers do not attract neither repel the  
56 insects. In addition, we noticed, that most of the insects preferred to reside on the  
57 rosette leaves rather than floral stems or flowers (Figure S3B), suggesting that the  
58 flowers are not required for leafhopper attraction. To analyse the impact of leaf-like  
59 flowers on leafhopper preference further, we removed both the leaf-like and wild-type  
60 flowers from plants in the insect choice experiments and found that the leafhoppers  
61 also preferred the GFP-SAP54 plants without leaf-like flowers (Figure 1B). *A.*  
62 *thaliana* plants used in insect choice tests so far were grown at long days to induce  
63 bolting and flowering. Next, we conducted choice tests on *A. thaliana* plants grown at  
64 short days and that had vegetative organs (rosettes) without flowers. Again, *M.*  
65 *quadrilineatus* produced more nymphs on GFP-SAP54 versus GFP (control) plants  
66 at the vegetative growth stage (Figure 1C), suggesting that not only changes in floral  
67 morphology but also physiological and developmental transformations during floral  
68 transition are not necessary for insect attraction. To confirm this finding, leafhoppers  
69 were also given a choice between single leaves of GFP-SAP54 and GFP plants. We  
70 found that the leafhoppers preferred to lay eggs onto single leaves of GFP-SAP54  
71 plants (Figure 1D), indicating that leafhoppers are attracted to the leaves. Taken  
72 together, these data suggest that leaf-like flowers are not required for host plant  
73 selection by the leafhopper vector, and that the SAP54-mediated modulation of plant

74 vegetative tissues rather than plant reproductive organs is involved in insect vector  
75 attraction.

76 The above experiments provide evidence that leaf-like flowers are not  
77 required for insect vector preference. Nonetheless, these flowers could contribute to  
78 the insect preference. To test this, we conducted choice experiments with *A. thaliana*  
79 lines displaying leaf-like flowers, including MTF mutant lines *ap1*<sup>9</sup> and *lfy*<sup>10</sup> and the  
80 35S:SVP transgenic line<sup>11</sup>. All these lines produce flowers that share leaf-like  
81 structures reminiscent to those of phytoplasma-infected and GFP-SAP54 transgenic  
82 plants<sup>6</sup>. We found that leafhoppers produce similar numbers of progeny on both  
83 plants indicating no colonization preference for either wild type or mutant plants with  
84 leaf-like floral phenotypes (Figure 2). These data are in agreement with insect  
85 preference for rosette leaves rather than floral stems or flowers (Figure S3B). Thus,  
86 the leaf-like flowers are neither required nor involved in the leafhopper vector  
87 preference.

88 Hitherto, direct analyses of the adaptive significance of parasite extended  
89 phenotypes have been limited because many parasites (such as phytoplasma) are  
90 not amenable to genetic manipulation and parasite genetic factors that induce the  
91 dramatic host alterations are often unknown. Here we used mechanistic knowledge  
92 of the phytoplasma virulence protein SAP54 to dissect if phytoplasma-induced  
93 phenotypic changes of plant hosts, including phyllody and insect vector attraction,  
94 are connected. We previously demonstrated that SAP54 interaction with the plant  
95 26S proteasome cargo protein RAD23 is required for both the induction of leaf-like  
96 flowers and insect vector attraction<sup>5</sup> supporting the hypothesis that phytoplasma-  
97 induced morphological changes in plants such as leaf-like flowers may be required  
98 for insect attraction<sup>12,13</sup>. However, this study has shown that leaf-like flowers are not

required nor are involved in insect vector attraction. Moreover, leafhoppers preferred plant vegetative tissues over reproductive organs. Thus, leaf-like flowers do not promote leafhopper colonization, even though these two phenotypes are genetically connected via SAP54 interaction with the 26S proteasome cargo protein RAD23<sup>5</sup>.

Phyllody-inducing 'Ca. *Phytoplasma asteris*' phytoplasmas, such as AY-WB, often infect annual plants that die upon completion of their life cycle<sup>14</sup>. Phytoplasmas are dependent on insect vectors for leaving the plant before it dies<sup>13</sup>. Thus, insect attraction promotes fitness of phytoplasma and therefore it is likely that insect vector attraction is the extended phenotype of SAP54. A role of leaf-like flowers in phytoplasma fitness has become less clear. It is possible that the induction of phyllody is a side effect of SAP54-mediated modulation of processes involved in insect attraction. SAP54 induces leaf-like flowers by mediating degradation of MTFs via interaction with RAD23<sup>5</sup>. MTFs are regulatory hubs for a plethora of physiological processes in plants, including plant immunity (comparable to animal HOX genes); several MTFs appear to (in)directly regulate cytokinin and jasmonic acid (JA) synthesis and response genes<sup>11</sup>, which affect plant-insect interactions<sup>15-18</sup>, such as that of the AY-WB leafhopper vector *M. quadrilineatus*<sup>19</sup>. In addition, MTFs regulate age-related resistance responses to pests<sup>20</sup>. Therefore, SAP54-mediated degradation of MTFs may modulate plant immunity leading to attraction of the leafhoppers.

Another AY-WB phytoplasma effector, SAP11, binds and destabilizes specific members of the TEOSINTE BRANCHED1, CYCLOIDEA, PROLIFERATING CELL FACTORS 1 and 2 (TCP) family and promotes leafhopper oviposition activity in no-choice tests<sup>19,21,22</sup>. TCPs are transcription factors conserved among plants that are regulatory hubs for plant growth and organ formation, and in addition, regulate a

variety of microRNAs and the plant defence hormones jasmonic acid (JA)<sup>23,24</sup> and salicylic acid (SA)<sup>25</sup>. Another phytoplasma effector, TENGU, also induces witch's broom-like symptoms in plants<sup>12</sup> and alters the plant JA and auxin hormone balance<sup>26</sup>, and it was suggested that the witch's broom-like symptoms attract the leafhopper vectors<sup>12</sup>. However, given that SAP11 decreases JA production, which increases leafhopper colonization<sup>27-29</sup>, it remains to be investigated if witch's broom symptoms are involved in the leafhopper colonization preference. Thus, the SAP54, SAP11 and TENGU effectors all alter plant development that resemble symptoms of phytoplasma-infected plants, but for SAP54 we have now shown that the alterations in plant development (leaf-like flowers) are not required for insect preference.

Targeting conserved plant proteins, such as MTFs and TCPs by phytoplasma effector proteins may enable the phytoplasma parasites to infect a broad range of plant species. The 26S proteasome shuttle proteins RAD23 are also conserved among plant species<sup>30</sup>. Compatibility of phytoplasmas with multiple plant species is essential given that AY-WB phytoplasma and related parasites are transmitted by polyphagous insect species of the genus *Macrostelus*<sup>13,14</sup>. Because these insects readily feed on many plant species, phytoplasmas will increase their fitness if they can modulate these plants to increase attraction and colonization of insect vectors. In agreement with this, SAP54 homologs are found in diverse phyllody-inducing phytoplasmas that infect a wide range of plant species<sup>6,31,32</sup>. Thus, generalist parasites, especially those dependent on alternative hosts for transmission, could gain fitness benefits via interfering with conserved host processes.

The adaptationist view is that parasite-induced changes in hosts are selected for the benefit of the parasite<sup>1,33</sup>. Alternatively, the activity of parasite genes may also lead to the emergence of non-adaptive secondary phenomena<sup>7</sup>. In agreement

with the latter, phyllody in phytoplasma-infected plants may have been selected together with the primary adaptive role of SAP54 in enhancing insect vector attraction. Like phytoplasmas, other parasites induce a complex package of changes in hosts, some of which are viewed as adaptive or neutral with respect to selective pressures. For example, alterations in limb morphology and number in trematode (*Ribeiroia* species) infected frogs may or may not be the primary evolutionary mechanism for vertical transmission to birds<sup>3,34</sup>. Similarly, the adaptive significance of the leaf morphological changes induced by gall-forming insects remains to be tested and is subject to various alternative hypothesis<sup>35,36</sup>, although the adaptive explanations tend to be preferred. The non-adaptive explanation and the adaptationist view are equally instrumental in understanding the evolution of parasite-altered host phenotypes and mechanistic insights into the functions of parasite virulence genes, as we did for SAP54, are key to uncouple the two.

## Experimental Procedures

### Generation of plants for insect assays

Generation of 35S:GFP-SAP54 and 35S:GFP transgenic *Arabidopsis* lines was done according to methods described in<sup>6</sup>. *A. thaliana ap1* and *lfy* mutant were obtained from NASC (ID: N6232, allele ap1-12; ID: N6228, allele lfy-1). The 35S:SVP lines were kindly provided by Martin Kater and described in<sup>11</sup>. The rad23 mutant lines were provided by Richard Vierstra and described in<sup>30</sup>. To generate infected plants, five-week old plants were infected with 'Ca. Phytoplasma asteris' strain Aster Yellow Witches Broom (AY-WB) by adding five AY-WB-carrier adult *Macrostelus quadrilineatus* Forbes (Hemiptera: Cicadellidae) to each plant in a transparent Perspex tube (10cm high, diameter 4cm) for inoculation access period of 5 days.

Three rosette leaves were collected for extraction of genomic DNA to confirm phytoplasma infection using AY-WB specific primers BF 5' AGGATGGAACCCTTCAATGTC 3' and BR 5' GGAAGTCGCCTACAAAATCC 3' <sup>5</sup>. All plants used in insect choice experiments were sown on insecticide-free F2 compost soil (Levington). In order to stimulate flowering, the test and control plants were transplanted in 10cm x 10cm square pots (F2 soil) and grown for 3 weeks at 22°C, long day photoperiod (16/8-hour light/dark). For the experiments involving no-flower formation, plants were grown at 22°C in short day photoperiod (10/14-hour light/dark) for 8 weeks.

#### Insect choice assay

All insect choice experiments were performed in transparent polycarbonate cages 62cm x 30cm x 41cm (H x W x D). Two opposite sides of the cage were fitted with white nylon mesh held by magnetic strips to the carcass of the cage for ventilation and access. Two test plants infected with AY-WB 21 days earlier were placed randomly diagonally opposite each other in the corners of a cage. 10 male and 10 female adult *M. quadrilineatus*, which did not carry AY-WB phytoplasma, were released from a transparent Perspex tube (9cm high, diameter 3cm) in the centre of the cage, at equal distance from each test plant. Adult insects were removed 5 days after addition to the cage. Plants were removed from the choice cage and contained individually in transparent perforated plastic bags at 22°C, long day photoperiod (16/8-hour light/dark). Nymphs were counted on each test plant 14 days after removal of adult insects from the cages. Data were expressed as proportion of total number of nymphs found on the test plants within each choice cage.



## Insect no-choice assay

For no-choice experiments 5 female and 5 male non-infected adult *M. quadrilineatus* were added to individual plants surrounded by a transparent plastic cage. Plants were grown and insect progeny measured as in choice experiments.

## Single-leaf insect choice assay

Single rosette leaves (not detached from the plant) from SAP54 and control plants were fitted opposite each other in a 2cm x 8cm x 12cm (H x W x D) transparent plastic cage fitted with nylon mesh-lined holes (4cm diam.) to allow for air circulation. Five male and 5 female adult *M. quadrilineatus* leafhoppers (which did not carry AY-WB) were introduced into the cage and allowed free access to both leaves. Eggs were dissected and counted under stereomicroscope (15x) five days after the addition of adult insects.

## Statistical analysis

Statistical analysis was performed in Minitab16. Insect oviposition data were analysed using paired t-test, two-tailed t-test or GLM when appropriate. Assumptions of the statistical tests – normal distribution and equal variance – were checked with the Anderson-Darling and the Levene's tests respectively.

## **Supplemental information**

Supplemental information contains three figures.

## References

- 1 Dawkins, R. *The Extended Phenotype: The Long Reach of the Gene*. 209  
(Oxford University Press, 1982).
- 2 Berdoy, M., Webster, J. P. & Macdonald, D. W. Fatal attraction in rats infected  
with *Toxoplasma gondii*. *P Roy Soc B-Biol Sci* **267**, 1591-1594 (2000).
- 3 Johnson, P. T. J., Sutherland, D. R., Kinsella, J. M. & Lunde, K. B. Review of  
the trematode genus *Ribeiroia* (Psilostomidae): Ecology, life history and  
pathogenesis with special emphasis on the amphibian malformation problem.  
*Adv Parasit* **57**, 191-253, doi:Doi 10.1016/S0065-308x(04)57003-3 (2004).
- 4 Le Fevre, R., Evangelisti, E., Rey, T. & Schornack, S. Modulation of Host Cell  
Biology by Plant Pathogenic Microbes. *Annu Rev Cell Dev Biol*,  
doi:10.1146/annurev-cellbio-102314-112502 (2015).
- 5 MacLean, A. M. *et al.* Phytoplasma Effector SAP54 Hijacks Plant  
Reproduction by Degrading MADS-box Proteins and Promotes Insect  
Colonization in a RAD23-Dependent Manner. *PLoS Biol.* **12**, doi:ARTN  
e1001835  
DOI 10.1371/journal.pbio.1001835 (2014).
- 6 MacLean, A. M. *et al.* Phytoplasma Effector SAP54 Induces Indeterminate  
Leaf-Like Flower Development in Arabidopsis Plants. *Plant Physiol.* **157**, 831-  
841, doi:DOI 10.1104/pp.111.181586 (2011).
- 7 Gould, S. J. & Lewontin, R. C. Spandrels of San-Marco and the Panglossian  
Paradigm - a Critique of the Adaptationist Program. *Proc R Soc Ser B-Bio*  
**205**, 581-598, doi:DOI 10.1098/rspb.1979.0086 (1979).
- 8 Mescher, M. C. in *Host Manipulation by Parasites* (eds D. P. Hughes, J.  
Brodeur, & F. Thomas) (Oxford University Press, 2012).

- 247 9 Mandel, M. A., Gustafson-Brown, C., Savidge, B. & Yanofsky, M. F. Molecular  
248 characterization of the Arabidopsis floral homeotic gene APETALA1. *Nature*  
249 **360**, 273-277, doi:10.1038/360273a0 (1992).
- 250 10 Weigel, D., Alvarez, J., Smyth, D. R., Yanofsky, M. F. & Meyerowitz, E. M.  
251 LEAFY controls floral meristem identity in Arabidopsis. *Cell* **69**, 843-859  
252 (1992).
- 253 11 Gregis, V. *et al.* Identification of pathways directly regulated by SHORT  
254 VEGETATIVE PHASE during vegetative and reproductive development in  
255 Arabidopsis. *Genome biology* **14**, R56, doi:10.1186/gb-2013-14-6-r56 (2013).
- 256 12 Hoshi, A. *et al.* A unique virulence factor for proliferation and dwarfism in  
257 plants identified from a phytopathogenic bacterium. *Proceedings of the*  
258 *National Academy of Sciences of the United States of America* **106**, 6416-  
259 6421, doi:10.1073/pnas.0813038106 (2009).
- 260 13 Weintraub, P. G. & Beanland, L. Insect vectors of phytoplasmas. *Annu. Rev.*  
261 *Entomol.* **51**, 91-111, doi:10.1146/annurev.ento.51.110104.151039 (2006).
- 262 14 Lee, I. M. *et al.* 'Candidatus Phytoplasma asteris', a novel phytoplasma taxon  
263 associated with aster yellows and related diseases. *Int J Syst Evol Microbiol*  
264 **54**, 1037-1048 (2004).
- 265 15 Erb, M., Meldau, S. & Howe, G. A. Role of phytohormones in insect-specific  
266 plant reactions. *Trends Plant Sci.* **17**, 250-259,  
267 doi:<http://dx.doi.org/10.1016/j.tplants.2012.01.003> (2012).
- 268 16 Giron, D. & Glevarec, G. Cytokinin-induced phenotypes in plant-insect  
269 interactions: learning from the bacterial world. *J Chem Ecol* **40**, 826-835,  
270 doi:10.1007/s10886-014-0466-5 (2014).

- 271 17 Naessens, E. *et al.* A Secreted MIF Cytokine Enables Aphid Feeding and  
272 Represses Plant Immune Responses. *Curr. Biol.* **25**, 1898-1903,  
273 doi:<http://dx.doi.org/10.1016/j.cub.2015.05.047> (2015).
- 274 18 Schafer, M. *et al.* Cytokinin levels and signaling respond to wounding and the  
275 perception of herbivore elicitors in *Nicotiana attenuata*. *Journal of integrative*  
276 *plant biology* **57**, 198-212, doi:10.1111/jipb.12227 (2015).
- 277 19 Sugio, A., Kingdom, H. N., MacLean, A. M., Grieve, V. M. & Hogenhout, S. A.  
278 Phytoplasma protein effector SAP11 enhances insect vector reproduction by  
279 manipulating plant development and defense hormone biosynthesis.  
280 *Proceedings of the National Academy of Sciences of the United States of*  
281 *America* **108**, E1254-E1263, doi:10.1073/pnas.1105664108 (2011).
- 282 20 Wilson, D. C., Carella, P., Isaacs, M. & Cameron, R. K. The floral transition is  
283 not the developmental switch that confers competence for the *Arabidopsis*  
284 age-related resistance response to *Pseudomonas syringae* pv. *tomato*. *Plant*  
285 *Mol Biol* **83**, 235-246, doi:10.1007/s11103-013-0083-7 (2013).
- 286 21 Bai, F., Reinheimer, R., Durantini, D., Kellogg, E. A. & Schmidt, R. J. TCP  
287 transcription factor, BRANCH ANGLE DEFECTIVE 1 (BAD1), is required for  
288 normal tassel branch angle formation in maize. *Proceedings of the National*  
289 *Academy of Sciences of the United States of America* **109**, 12225-12230,  
290 doi:DOI 10.1073/pnas.1202439109 (2012).
- 291 22 Sugio, A., MacLean, A. M. & Hogenhout, S. A. The small phytoplasma  
292 virulence effector SAP11 contains distinct domains required for nuclear  
293 targeting and CIN-TCP binding and destabilization. *New Phytol.* **202**, 838-848,  
294 doi:Doi 10.1111/Nph.12721 (2014).

- 295 23 Immink, R. G. H. *et al.* Characterization of SOC1's Central Role in Flowering  
296 by the Identification of Its Upstream and Downstream Regulators. *Plant*  
297 *Physiol.* **160**, 433-449, doi:DOI 10.1104/pp.112.202614 (2012).
- 298 24 Schommer, C. *et al.* Control of jasmonate biosynthesis and senescence by  
299 miR319 targets. *PLoS Biol.* **6**, 1991-2001, doi:ARTN e230  
300 DOI 10.1371/journal.pbio.0060230 (2008).
- 301 25 Wang, X. *et al.* TCP transcription factors are critical for the coordinated  
302 regulation of ISOCHORISMATE SYNTHASE 1 expression in Arabidopsis  
303 thaliana. *The Plant journal : for cell and molecular biology*,  
304 doi:10.1111/tpj.12803 (2015).
- 305 26 Minato, N. *et al.* The phytoplasmal virulence factor TENGU causes plant  
306 sterility by downregulating of the jasmonic acid and auxin pathways. *Sci Rep*  
307 **4**, 7399, doi:10.1038/srep07399 (2014).
- 308 27 Kallenbach, M., Bonaventure, G., Gilardoni, P. A., Wissgott, A. & Baldwin, I.  
309 T. Empoasca leafhoppers attack wild tobacco plants in a jasmonate-  
310 dependent manner and identify jasmonate mutants in natural populations.  
311 *Proceedings of the National Academy of Sciences of the United States of*  
312 *America* **109**, E1548-1557, doi:10.1073/pnas.1200363109 (2012).
- 313 28 Lu, Y. T. *et al.* Transgenic Plants That Express the Phytoplasma Effector  
314 SAP11 Show Altered Phosphate Starvation and Defense Responses. *Plant*  
315 *Physiol.* **164**, 1456-1469, doi:DOI 10.1104/pp.113.229740 (2014).
- 316 29 Sugio, A., Kingdom, H. N., MacLean, A. M., Grieve, V. M. & Hogenhout, S. A.  
317 Phytoplasma protein effector SAP11 enhances insect vector reproduction by  
318 manipulating plant development and defense hormone biosynthesis.

- 319        *Proceedings of the National Academy of Sciences of the United States of*  
320        *America* **108**, E1254-E1263, doi:DOI 10.1073/pnas.1105664108 (2011).
- 321    30    Vierstra, R. D. The ubiquitin-26S proteasome system at the nexus of plant  
322        biology. *Nature Reviews Molecular Cell Biology* **10**, 385-397,  
323        doi:10.1038/nrm2688 (2009).
- 324    31    Bertaccini, A. Phytoplasmas: diversity, taxonomy, and epidemiology. *Front*  
325        *Biosci* **12**, 673-689, doi:Doi 10.2741/2092 (2007).
- 326    32    Maejima, K. *et al.* Recognition of floral homeotic MADS domain transcription  
327        factors by a phytoplasmal effector, phylogen, induces phyllody. *Plant J.* **78**,  
328        541-554, doi:DOI 10.1111/tpj.12495 (2014).
- 329    33    Dawkins, R. Parasites, desiderata lists and the paradox of the organism.  
330        *Parasitology* **100**, S63-S73 (1990).
- 331    34    Skelly, D. K., Bolden, S. R., Freidenburg, L. K., Freidenfelds, N. A. & Levey,  
332        R. Ribeiroia infection is not responsible for Vermont amphibian deformities.  
333        *EcoHealth* **4**, 156-163, doi:10.1007/s10393-007-0103-7 (2007).
- 334    35    Stone, G. N. & Cook, J. M. The structure of cynipid oak galls: patterns in the  
335        evolution of an extended phenotype. *P Roy Soc B-Biol Sci* **265**, 979-988  
336        (1998).
- 337    36    Stone, G. N. & Schonrogge, K. The adaptive significance of insect gall  
338        morphology. *Trends Ecol. Evol.* **18**, 512-522, doi:Doi 10.1016/S0169-  
339        5347(03)00247-7 (2003).

340

341

## Acknowledgements

We thank Enrico Coen and Sophien Kamoun for critical feedback on manuscript versions, Richard D. Vierstra (Department of Genetics, University of Wisconsin-Madison) and Martin M. Kater (Department of Bioscience, Università degli Studi di Milano) for kindly providing seed of *A. thaliana* rad23 mutants and 35S:SVP overexpression lines, respectively. We are grateful to Ian Bedford, Anna Jordan, and Gavin Hatt (JIC Insectary) for rearing and care of leafhopper and phytoplasma stocks and the John Innes Horticultural Services for growing the plants used in this study. We also thank Andrew Davis for plant photographs. The work was funded by BBSRC (BB/J0045531/1) and a BBSRC student fellowship awarded to ZO.

## Authors Contributions

ZO designed the experiments, carried out all experimental work, performed data analysis and drafted the manuscript; SH coordinated the study and helped draft the manuscript. All authors gave final approval for publication.

## Competing financial interests

Authors declare no competing financial interests.

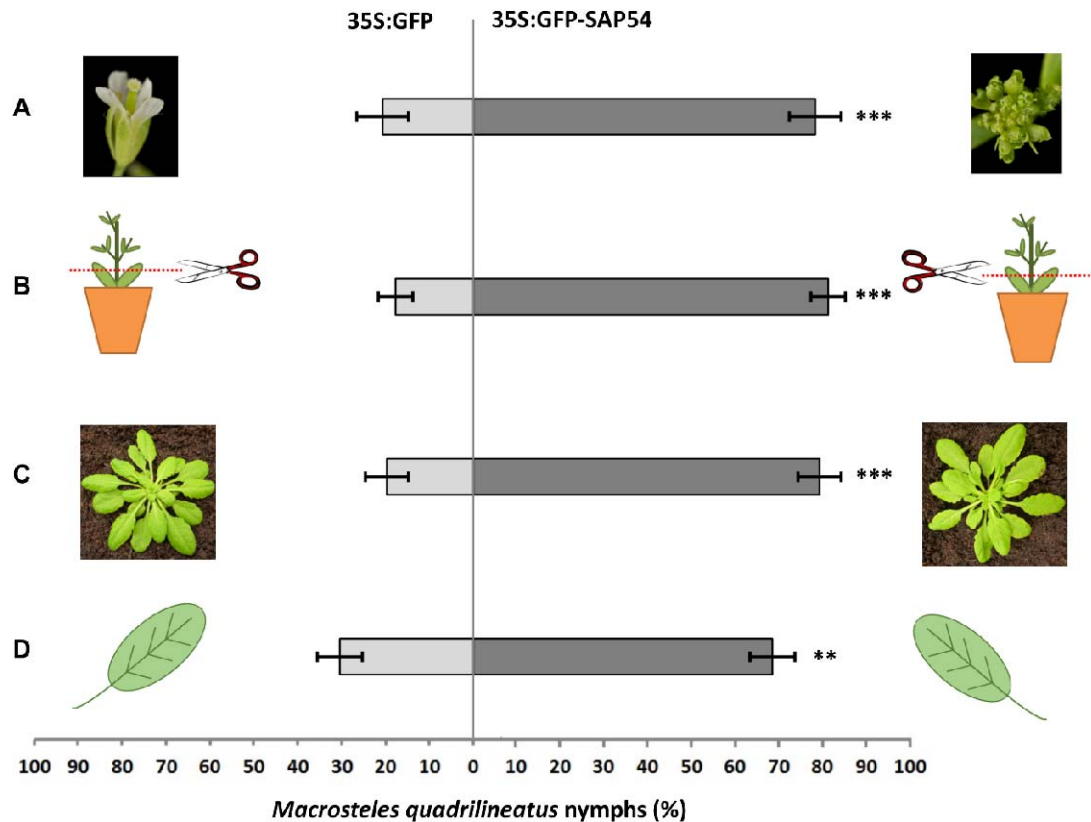

**Figure 1. Flowers and transition from floral to vegetative phase are not required for SAP54-mediated enhancement of insect colonization. (A)** *M. quadrilineatus* produces more nymphs on 35S:GFP-SAP54 transgenic *A. thaliana* (Col-0) plants with leaf-like flowers than on 35S:GFP (Col-0) control plants with wild type flowers ( $p \leq 0.001$ ). **(B)** Removal of flowers and floral stems does not affect *M. quadrilineatus* colonization preference of 35S:GFP-SAP54 transgenic *A. thaliana* (Col-0). **(C)** Leafhoppers also prefer GFP-SAP54 transgenic plants prior to transition from vegetative to floral growth (plants grown under short day photoperiod 10h/14h light/dark). **(D)** *M. quadrilineatus* lays more eggs on single rosette leaves of GFP-SAP54 transgenic plants. Except for C, all other choice tests were conducted with 6-week old plants grown at 22°C, 16/8-hour light/dark. For A-C, 10 male and female leafhoppers were offered to choose between opposite-facing whole plants for 5 days.



373 Leafhoppers were removed and the individual plants were bagged. The total number  
 374 of nymphs per plants in each test cage were counted two weeks later. In D,  
 375 leafhoppers were allowed to chose between equally sized rosette leaves from  
 376 opposite-facing 35S:GFP and 35S:GFP-SAP54 plants for 5 days. Upon removal of  
 377 the leafhoppers, eggs laid on the leaf surface were counted. Bars show the mean  
 378 percentages  $\pm$ SEM of nymphs/eggs per total number of nymphs/eggs per test cage  
 379 at n= 6 cages. \*\*\*  $p \leq 0.001$ ; \*\*  $p \leq 0.025$  (paired t-test). All experiments were repeated  
 380 three times with similar results.  
 381

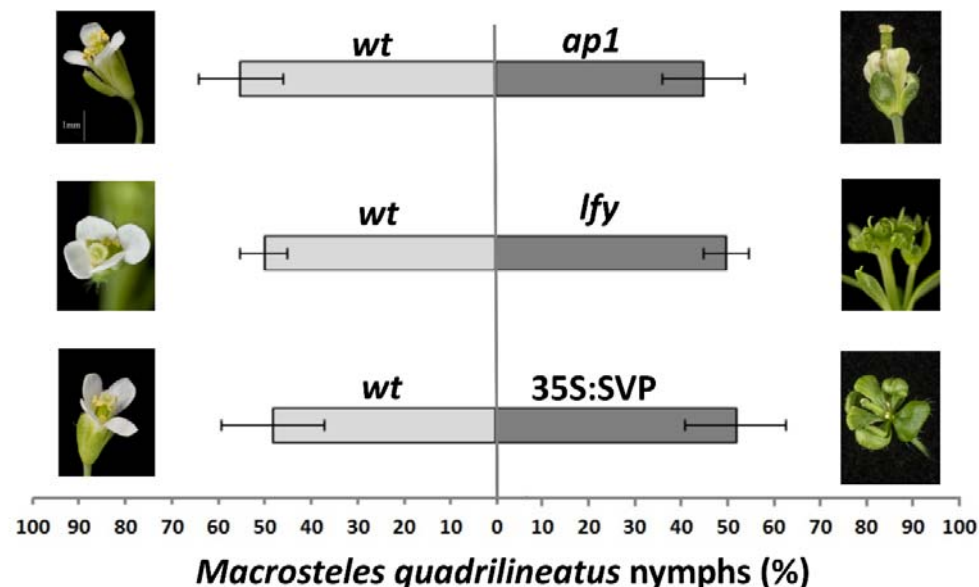

382  
 383 **Figure 2. Aster leafhopper *Macrosteles quadrilineatus* has similar oviposition**  
 384 **preference for plants with normal and leaf-like flower phenotype. *M.***  
 385 *quadrilineatus* did not show a preference for colonization of Col-0 wild type versus  
 386 Col-0 *apetala1* (*ap1-12*) ( $p=0.835$ ), Col-0 versus Col-0 *leafy* (*lfy-1*) ( $p=0.985$ ) and  
 387 Col-0 versus 35S:SVP (Col-0) ( $p=0.960$ ). Experiments were conducted with whole  
 388 plants as described in the legend of Fig. 1. Bars shows percentages  $\pm$ SE of living

389 *M.quadrilineatus* nymphs found on each test plant per total number of nymphs within  
390 a single choice cage. Data were analysed by paired t-tests. All experiments were  
391 repeated three times with similar results.

392

393

## Supplemental information

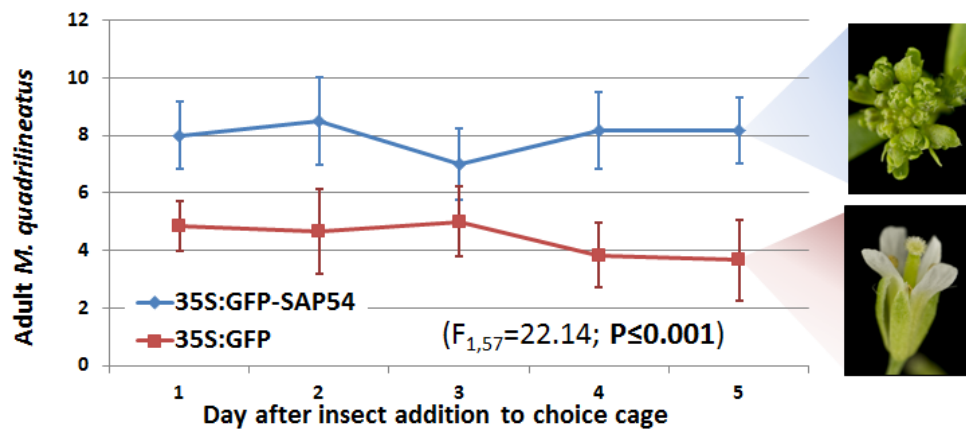

**Figure S1. Aster leafhopper *Macrosteles quadrilineatus* demonstrates significantly greater residency preference for SAP54 expressing plants with leaf like-flowers.** Plants were grown at 22°C, 16/8-hour light/dark to stimulate flowering. Six-week old plants were used for insect choice assay. 10 female and 10 male AY-WB non-infected adult leafhoppers were released in a choice cage containing two test plants for the period of 5 days. Insects could freely move between the plants. Significantly more insects were found on SAP54 plants over the entire 5 day choice period (GLM with time as covariate;  $F_{1,57}=22.14; P\leq 0.001$ ).

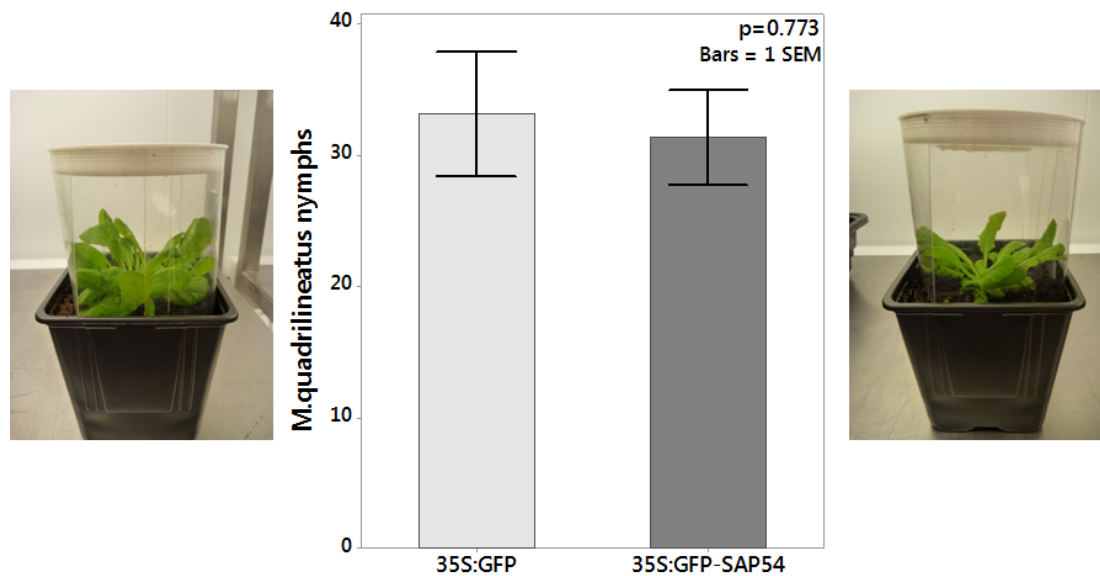

**Figure S2. No-choice tests of *M. quadrilineatus* leafhoppers on SAP54 transgenic plants.** Equal number of adult *M. quadrilineatus* (5 female + 5 males) were forced to feed and reproduce on SAP54 and control plants to mimic equal host plant selection by insects. Insects were removed 5 days later and nymphs were counted on each test plant 14 days after removal of adult insects from the cages. In contrast to the choice experiments, there was no difference in the number of leafhopper nymphs produced on both plants (paired t-test; n=6; p=0.773).

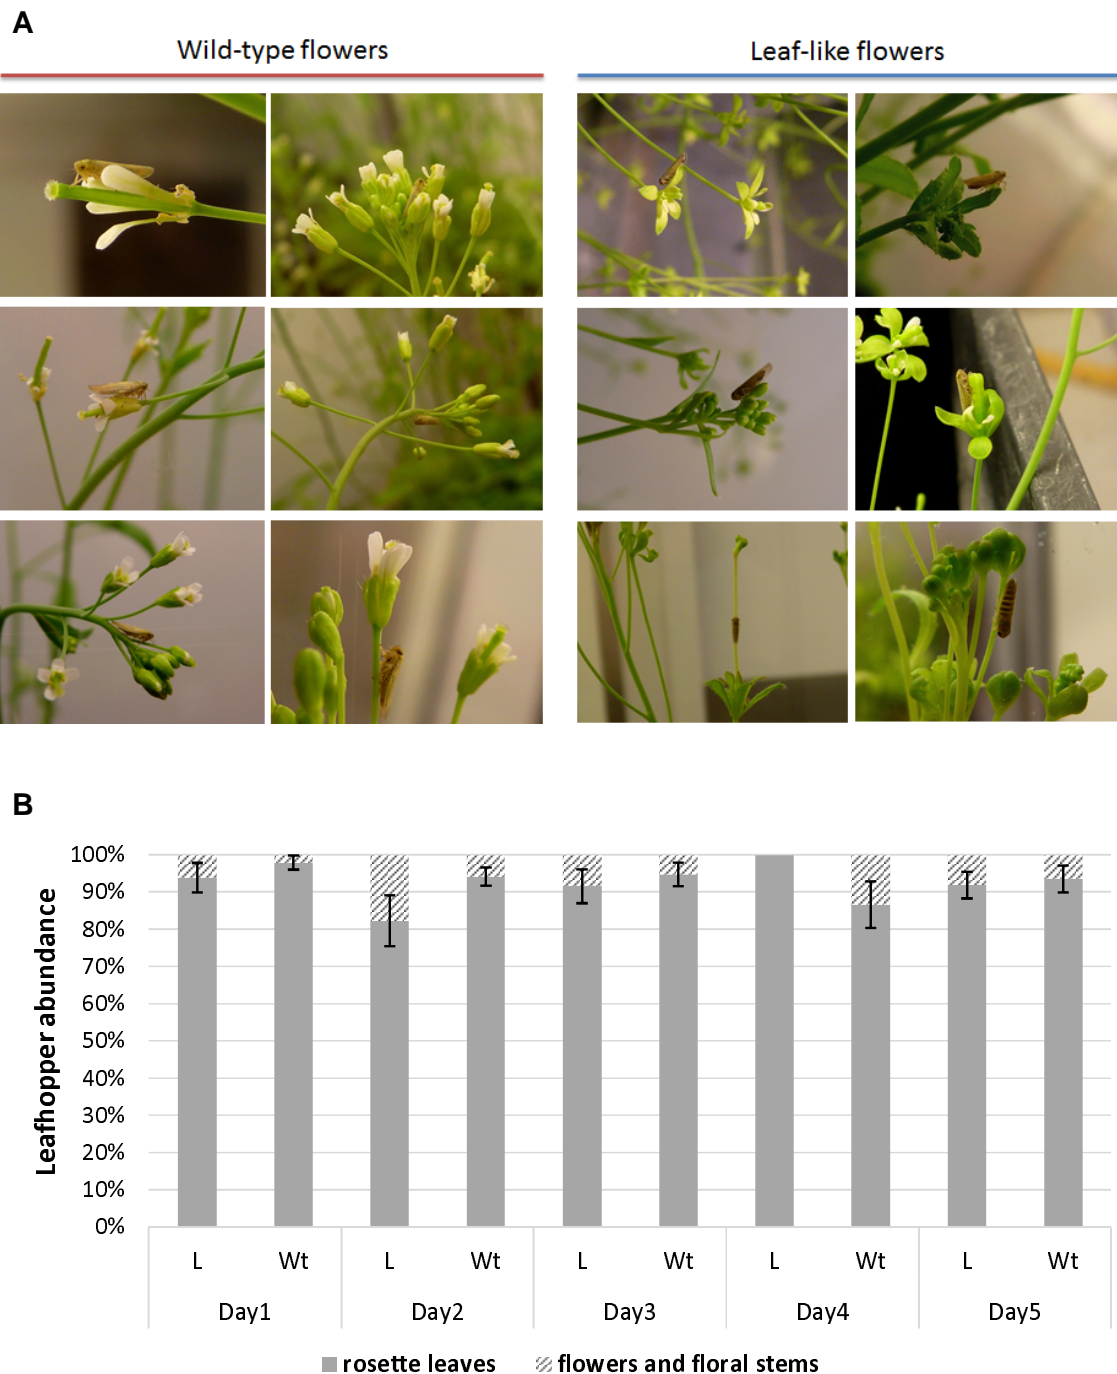

**Figure S3. Leafhoppers demonstrate similar distribution on plants with leaf-like and wild-type flowers.** **A.** *M. quadrilineatus* leafhoppers were photographed whilst residing and feeding on all parts of *Arabidopsis thaliana* (Col-0) plants, including rosette leaves and petioles, stems, cauline leaves and flowers. Insects were found feeding on carpels, sepals, petals and pedicels of wild-type *Arabidopsis*

431 *thaliana* (Col-0) flowers as well as the leaf-like flowers produced by AY-WB infection  
 432 or overexpression of a SAP54 alone. **B.** A plant with wild type and a plant with leaf-  
 433 like flowers were put in a transparent plastic cage and exposed to 10 male and 10  
 434 female adult leafhoppers. Insects were counted separately on floral parts and  
 435 rosettes for each test plant in the cage once a day. The proportion of insects found  
 436 on each tissue type is plotted as the mean of 8 replicate cages (bars = 1 SEM).  
 437 *M. quadrilineatus* has significant residency preference for rosette leaves compared to  
 438 other floral structures both on AY-WB infected *rad23BCD* mutant plants with leaf-like  
 439 (L) flowers and AY-WB infected *rad23BD* mutant plants with wild-type flowers (GLM  
 440 with time as covariate;  $F_{1,137}=1797.78$ ;  $P\leq 0.001$ ). There is no difference between  
 441 insect residency on wild-type and leaf-like flowers during the five-day leafhopper  
 442 choice experiment (GLM with time as covariate;  $F_{1,67}=0.19$ ;  $P=0.666$ ).  
 443
